# Supplementary material for: Global Trends and Risk Factors of Lip and Oral Cavity Cancer from 1990 to 2021: A GBD 2021-Based Analysis
Source: Research Square preprint supplement (doi:10.21203/rs.3.rs-6671325/v1), 2025-06-02
Supplement: Supplementary file 1 [file 5c65f786173381a7810cd7f3.docx]

**Supplement table 1. The DALYs of LOCC and temporal trend by Sex and 21 regions from 1990 to 2021**

| **Location** | **Female** |  |  | **Male** |  |  |
| --- | --- | --- | --- | --- | --- | --- |
|  | 1990 | 2021 | APPC | 1990 | 2021 | AAPC |
| **Andean Latin America** | 22.27  (19.42~25.27) | 21.26  (16.87~26.6) | 0.03  （-0.66 ~0.72） | 29.61  (24.96~34.92) | 23.9  (18.93~29.83) | -0.56  (-0.94 ~-0.17) |
| **Australasia** | 25.66  (23.92~27.24) | 19.73  (17.84~21.55) | -0.82  （-1.62 ~-0.01) | 73.81  (66.51~81.36) | 49.62  (43.66~56.13) | -1.29  (-1.83 ~-0.75) |
| **Caribbean** | 34.57  (32.44~37.14) | 27.15  (23.57~31.57) | -0.80  (-1.51~ -0.08) | 97.03  (88.86~107.82) | 88.76  (75.28~104.84) | -0.11  (-0.26 ~0.05) |
| **Central Asia** | 26.19  (24.25~28.69) | 27.32  (23.7~31.13) | 0.34  (-0.17~ 0.86) | 89.28  (83.18~97.23) | 60.81  (53.09~70.08) | -1.21  (-1.96~ -0.45) |
| **Central Europe** | 25.41  (24.34~26.49) | 29.5  (27.02~31.76) | 0.49  (0.01~ 0.98) | 149.71  (142.81~157.56) | 141.4  (129.47~153.44) | -0.15  (-0.43~ 0.13) |
| **Central Latin America** | 23.84  (22.94~24.59) | 19.14  (16.77~21.64) | -0.63  (-1.15~ -0.10) | 39.63  (38.04~41.17) | 32.04  (27.93~36.42) | -0.82  (-1.40~ -0.25) |
| **Central Sub-Saharan Africa** | 33.39  (24.88~43.68) | 33.65  (22.59~49.04) | 0.01  (-0.04 ~0.05) | 56.82  (42~82.51) | 59.54  (45.02~77.35) | 0.15  (0.06 ~0.25) |
| **East Asia** | 20.5  (16.89~24.63) | 12.75  (9.97~15.94) | -1.53  (-1.72~ -1.33) | 45.99  (38.15~54.8) | 52.19  (40.96~65.38) | 0.38  (0.25 ~0.51) |
| **Eastern Europe** | 22.82  (21.45~23.93) | 31.45  (28.02~35.26) | 1.23  (0.80~ 1.66) | 157.74  (151.11~169.2) | 146.98  (129.18~166.01) | -0.05  (-0.78~ 0.69) |
| **Eastern Sub-Saharan Africa** | 51.33  (44.12~61.43) | 48.12  (39.6~58.19) | -0.21  (-0.31~ -0.10) | 94.04  (79.66~109.72) | 93.15  (72.47~113.74) | -0.03  (-0.10~ 0.05) |
| **High-income Asia Pacific** | 15.21  (14.3~15.92) | 16.75  (14.66~18.18) | 0.28  (-0.16 ~0.71) | 39.27  (38.03~40.66) | 37.56  (34.95~39.86) | -0.22  (-0.57~ 0.12) |
| **High-income North America** | 29.44  (27.98~30.49) | 20.01  (18.65~21.06) | -1.27  (-1.50 ~-1.03) | 82.5  (79.93~84.86) | 50.11  (47.79~52.39) | -1.61  (-1.93~ -1.29) |
| **North Africa and Middle East** | 14.43  (12.55~16.56) | 14.32  (12.54~16.39) | -0.04  (-0.14 ~0.06) | 23.47  (19.68~27.68) | 20.99  (18.23~24) | -0.37  (-0.47 ~-0.27) |
| **Oceania** | 24.67  (18.39~32.18) | 28.05  (21.09~37.14) | 0.40  (0.21~ 0.59) | 49.32  (34.21~64.98) | 57.43  (40.38~75.16) | 0.50  (0.40~ 0.60) |
| **South Asia** | 124.2  (106.92~140.95) | 132.05  (114.19~152.29) | 0.22  (0.09~ 0.34) | 219.81  (191.16~249.18) | 233.17  (187.49~270.97) | 0.19  (0.07~ 0.31) |
| **Southeast Asia** | 45.3  (38.68~51.86) | 39.85  (33.37~47.42) | -0.42  (-0.48~ -0.35) | 83.22  (71.07~95.29) | 83.89  (71.52~96.46) | 0.03  (-0.01~ 0.08) |
| **Southern Latin America** | 18.75  (17.74~19.63) | 17.44  (16.16~18.64) | -0.20  (-0.91 ~0.51) | 79.32  (70.92~88.4) | 48.1  (42.11~54.31) | -1.41  (-1.98 ~-0.84) |
| **Southern Sub-Saharan Africa** | 37.02  (30.49~44.19) | 41.83  (37.01~47.78) | 0.36  (0.10 ~0.62) | 131.82  (96.12~163.22) | 120.28  (102.71~135.44) | -0.27  (-0.40 ~-0.14) |
| **Tropical Latin America** | 27.7  (26.14~29) | 26.75  (24.69~28.11) | -0.08  (-0.35 ~0.19) | 113.77  (108.02~119.77) | 97.83  (91.27~105.16) | -0.48  (-0.78~ -0.19) |
| **Western Europe** | 23.03  (22.09~23.68) | 22.46  (20.78~23.71) | -0.09  (-0.37 ~0.19) | 118.73  (113.38~123.77) | 61.92  (57.99~65.73) | -2.10  (-2.42 ~-1.79) |
| Western Sub-Saharan Africa | 24.57  (19.43~29.41) | 28.04  (22.08~35.67) | 0.42  (0.36 ~0.47) | 19.7  (24.03~15.63) | 23.44  (18.09~29.32) | 0.56  (0.50 ~0.62) |

**Supplement table 2： AAPC of DAYLs increased countries from 1990 to 2021（AAPC>0,P<0.05）**

| **location** | **AAPC** | **AAPC C.I. Low** | **AAPC C.I. High** | **P-Value** |
| --- | --- | --- | --- | --- |
| Cabo Verde | 10.854 | 10.3864 | 11.3236 | 0 |
| North Macedonia | 2.5933 | 2.289 | 2.8986 | 0 |
| Syrian Arab Republic | 2.5449 | 2.1553 | 2.936 | 0 |
| Grenada | 2.0951 | 1.2995 | 2.8969 | 0 |
| Ecuador | 1.6353 | 1.335 | 1.9365 | 0 |
| Viet Nam | 1.5142 | 1.2823 | 1.7467 | 0 |
| Yemen | 1.4933 | 1.2131 | 1.7744 | 0 |
| Lebanon | 1.4553 | 1.2743 | 1.6366 | 0 |
| Chad | 1.3826 | 1.2906 | 1.4748 | 0 |
| Seychelles | 0.9992 | 0.8545 | 1.1441 | 0 |
| Timor-Leste | 0.9928 | 0.886 | 1.0997 | 0 |
| Saudi Arabia | 0.9458 | 0.7951 | 1.0967 | 0 |
| Slovenia | 0.8991 | 0.7583 | 1.0401 | 0 |
| Guinea | 0.8792 | 0.8063 | 0.9521 | 0 |
| Kazakhstan | 0.8579 | 0.7696 | 0.9463 | 0 |
| Malta | 0.8293 | 0.7544 | 0.9043 | 0 |
| Papua New Guinea | 0.779 | 0.5845 | 0.9739 | 0 |
| Panama | 0.7469 | 0.5657 | 0.9285 | 0 |
| Tokelau | 0.7465 | 0.6246 | 0.8686 | 0 |
| Lesotho | 0.7315 | 0.5331 | 0.9304 | 0 |
| Morocco | 0.689 | 0.5828 | 0.7954 | 0 |
| Uzbekistan | 0.6861 | 0.4696 | 0.903 | 0 |
| Nicaragua | 0.6773 | 0.5719 | 0.7827 | 0 |
| Ghana | 0.652 | 0.5206 | 0.7836 | 0 |
| Turkmenistan | 0.6362 | 0.5997 | 0.6727 | 0 |
| Burkina Faso | 0.6352 | 0.4133 | 0.8576 | 0 |
| Cameroon | 0.6108 | 0.4953 | 0.7265 | 0 |
| Nigeria | 0.5859 | 0.5141 | 0.6578 | 0 |
| Benin | 0.573 | 0.3665 | 0.7799 | 0 |
| Niger | 0.5219 | 0.4585 | 0.5853 | 0 |
| Togo | 0.5109 | 0.4486 | 0.5732 | 0 |
| Guatemala | 0.5033 | 0.4497 | 0.5568 | 0 |
| San Marino | 0.4856 | 0.3314 | 0.6401 | 0 |
| Namibia | 0.4591 | 0.4141 | 0.5041 | 0 |
| Marshall Islands | 0.4551 | 0.3017 | 0.6087 | 0 |
| Oman | 0.4536 | 0.3628 | 0.5445 | 0 |
| Mexico | 0.4459 | 0.4177 | 0.4741 | 0 |
| Cambodia | 0.3212 | 0.2737 | 0.3686 | 0 |
| Estonia | 0.3168 | 0.1971 | 0.4365 | 0 |
| Kenya | 0.2843 | 0.2472 | 0.3214 | 0 |
| India | 0.2292 | 0.1705 | 0.288 | 0 |
| Montenegro | 0.1456 | 0.0959 | 0.1954 | 0 |
| Myanmar | 0.4369 | 0.249 | 0.6251 | 0.000005 |
| Turkiye | 0.1868 | 0.1056 | 0.2681 | 0.000006 |
| Philippines | 0.5426 | 0.3027 | 0.783 | 0.000009 |
| Côte d'Ivoire | 0.2336 | 0.1195 | 0.3478 | 0.000059 |
| Haiti | 0.6488 | 0.3289 | 0.9696 | 0.000068 |
| Indonesia | 0.3312 | 0.1628 | 0.5 | 0.000115 |
| Republic of Moldova | 1.2791 | 0.5377 | 2.026 | 0.000697 |
| Madagascar | 0.3255 | 0.1368 | 0.5145 | 0.000717 |
| Serbia | 0.2663 | 0.1059 | 0.4269 | 0.001132 |
| Angola | 0.3304 | 0.1019 | 0.5594 | 0.00457 |
| Uganda | 1.014 | 0.3045 | 1.7286 | 0.005026 |
| Iceland | 0.2151 | 0.0592 | 0.3713 | 0.006847 |
| Cook Islands | 0.2333 | 0.0635 | 0.4033 | 0.007061 |
| Thailand | 0.146 | 0.0193 | 0.2728 | 0.023883 |
| Gambia | 1.1316 | 0.0982 | 2.1756 | 0.031771 |
| Micronesia (Federated States of) | 0.0869 | 0.0051 | 0.1688 | 0.037397 |
